# Supplementary material for: Species variability and connectivity in the deep sea: evaluating effects of spatial heterogeneity and hydrodynamics
Source: Copernicus journal article supplement (doi:10.5194/bg-2016-134), 2016-05-02
Supplement: Supplementary file 1 [file bg-2016-134-supplement.pdf]

Supplementary material for [[L Lins](#)], [2016], [[Species variability and connectivity in the deep sea: evaluating effects of spatial heterogeneity and hydrodynamic effects](#)]

**Species variability and connectivity in the deep sea: evaluating effects of spatial heterogeneity and hydrodynamic effects**

Supplementary material for [L Lins], [2016], [Species variability and connectivity in the deep sea: evaluating effects of spatial heterogeneity and hydrodynamic effects]

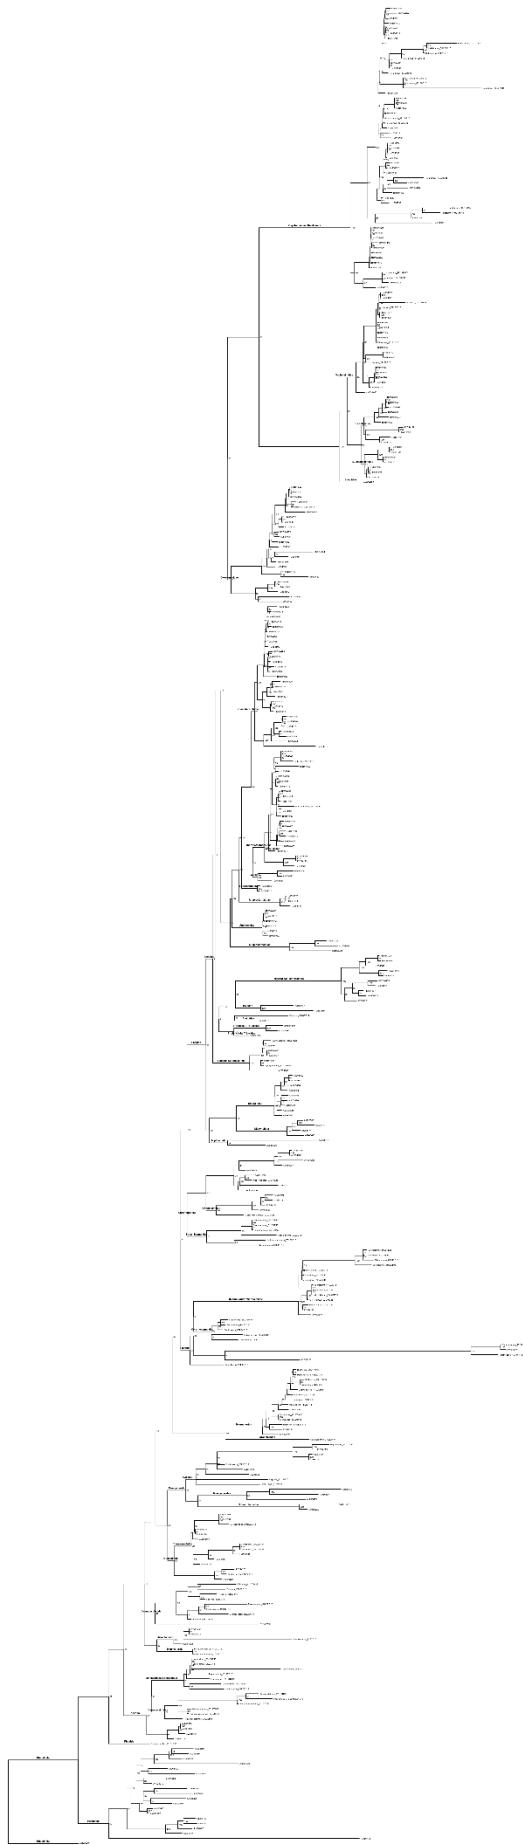

**Supplementary Figure 1:** Partial-18S rDNA phylogeny of Nematoda: Chromadorea. The inferred relationships support a broad taxonomic representation of nematodes in samples from lower shelf and upper slope at the West-Iberian Margin and furthermore indicate neither geographic nor depth clustering between 'deep' and 'shallow' taxa at any level of the tree topology. Reconstruction of nematode 18S relationships was conducted using Maximum Likelihood. Bootstrap support values were generated using 1000 replicates and are presented as node support. The analyses were performed by means of Randomized Axelerated Maximum Likelihood (RAxML). Branch (line) width represents statistical support. Sequences retrieved from Genbank are represented by their Genbank Accession numbers. Orders and Families are annotated as branch labels.

---

PERMANOVA table of results  
(2-factor design)

| Source         | df | SS | MS     | Pseudo-F | P(perm) | Unique perms  |      |
|----------------|----|----|--------|----------|---------|---------------|------|
| Depth          |    | 1  | 105.29 | 105.29   | 18,037  | <b>0.0027</b> | 3014 |
| Station(Depth) |    | 8  | 45,042 | 56,302   | 28,113  | <b>0.0001</b> | 9929 |
| Res            |    | 22 | 4,406  | 0.20027  |         |               |      |
| Total          |    | 31 | 155    |          |         |               |      |

---

PAIR-WISE TESTS

Term 'Station(Depth)'

Within level 'DEEP' of factor 'Depth'

| Groups | t       | Unique perms | P(MC)  |
|--------|---------|--------------|--------|
| D1, D2 | 14,453  | 35           | 0.1836 |
| D1, D3 | 0.21922 | 35           | 0.9692 |
| D1, D4 | 11,404  | 35           | 0.2898 |
| D2, D3 | 28,189  | 35           | 0.0062 |
| D2, D4 | 0.74526 | 35           | 0.5423 |
| D3, D4 | 17,462  | 35           | 0.0754 |

Within level 'SHALLOW' of factor 'Depth'

| Groups | t | Unique perms | P(MC) |
|--------|---|--------------|-------|
|--------|---|--------------|-------|

Supplementary material for [L Lins], [2016], [Species variability and connectivity in the deep sea: evaluating effects of spatial heterogeneity and hydrodynamic effects]

|            |         |    |               |
|------------|---------|----|---------------|
| S1, S4     | 52,363  | 10 | <b>0.005</b>  |
| S1, S7     | 14,786  | 10 | <b>0.0004</b> |
| S1, S2     | 59,548  | 10 | <b>0.0019</b> |
| S1, S614   | 54,457  | 10 | <b>0.0094</b> |
| S1, S613   | 10,274  | 10 | <b>0.0004</b> |
| S4, S7     | 15,104  | 10 | <b>0.0009</b> |
| S4, S2     | 72,374  | 10 | <b>0.0008</b> |
| S4, S614   | 7.09    | 10 | <b>0.0027</b> |
| S4, S613   | 12,505  | 10 | <b>0.0002</b> |
| S7, S2     | 27,661  | 10 | 0.0586        |
| S7, S614   | 41,579  | 3  | <b>0.036</b>  |
| S7, S613   | 61,604  | 10 | <b>0.0049</b> |
| S2, S614   | 10,659  | 10 | 0.3696        |
| S2, S613   | 0.80935 | 10 | 0.4851        |
| S614, S613 | 0.81016 | 10 | 0.4904        |

**Supplementary Table 1:** Table of results from the multivariate PERMANOVA two-way nested design test and pairwise t-tests for sediment composition. Values in bold represent significant values.

---

PERMANOVA table of results  
(2-factor design)

| Source         | df | SS      | MS       | Pseudo-F | P(perm)       | Unique perms |
|----------------|----|---------|----------|----------|---------------|--------------|
| Depth          | 1  | 28,266  | 28,266   | 290.31   | <b>0.0038</b> | 3009         |
| Station(Depth) | 8  | 0.75128 | 9.39E+01 | 13,912   | 0.2576        | 9951         |
| Res            | 22 | 14,851  | 6.75E+02 |          |               |              |
| Total          | 31 | 31      |          |          |               |              |

---

PAIR-WISE TESTS

Within level 'DEEP' of factor 'Depth'

| Groups | t       | Unique perms | P(MC)  |
|--------|---------|--------------|--------|
| D1, D2 | 0.87706 | 35           | 0.4193 |
| D1, D3 | 21,165  | 35           | 0.0767 |
| D1, D4 | 15,794  | 35           | 0.1669 |
| D2, D3 | 12,268  | 35           | 0.28   |
| D2, D4 | 0.4402  | 35           | 0.6771 |
| D3, D4 | 0.94545 | 35           | 0.3727 |

Within level 'SHALLOW' of factor 'Depth'

| Groups     | t        | Unique perms | P(MC)         |
|------------|----------|--------------|---------------|
| S1, S4     | 11,198   | 10           | <b>0.0006</b> |
| S1, S7     | 38,705   | 10           | <b>0.0297</b> |
| S1, S2     | 11,958   | 10           | 0.2967        |
| S1, S614   | 0.69613  | 10           | 0.5416        |
| S1, S613   | 10,709   | 10           | 0.3462        |
| S4, S7     | 12,439   | 10           | <b>0.0016</b> |
| S4, S2     | 59,381   | 10           | <b>0.0047</b> |
| S4, S614   | 36,069   | 10           | <b>0.0393</b> |
| S4, S613   | 81,676   | 10           | <b>0.0015</b> |
| S7, S2     | 12,966   | 10           | 0.2842        |
| S7, S614   | 0.7778   | 3            | 0.5125        |
| S7, S613   | 21,078   | 10           | 0.1247        |
| S2, S614   | 4.62E+02 | 10           | 0.9641        |
| S2, S613   | 0.2926   | 10           | 0.7909        |
| S614, S613 | 0.13656  | 10           | 0.8965        |

**Supplementary Table 2:** Table of results from the multivariate PERMANOVA two-way nested design test and pairwise t-tests for Total Organic Matter (%). Values in bold represent significant values.

PERMANOVA table of results

(2-factor design)

| Source         | df | SS     | MS       | Pseudo-F | P(perm)       | Unique perms |
|----------------|----|--------|----------|----------|---------------|--------------|
| Depth          | 1  | 26,291 | 26,291   | 117.4    | <b>0.0044</b> | 2982         |
| Station(Depth) | 8  | 1,728  | 0.216    | 2.1723   | 0             | 9948         |
| Res            | 22 | 2.1876 | 9.94E+02 |          |               |              |
| Total          | 31 | 31     |          |          |               |              |

PAIR-WISE TESTS

Term 'Station(Depth)'

Within level 'DEEP' of factor 'Depth'

| Groups | t        | Unique perms | P(MC)  |
|--------|----------|--------------|--------|
| D1, D2 | 6.24E+02 | 35           | 0.9543 |
| D1, D3 | 14,616   | 35           | 0.1973 |
| D1, D4 | 16,115   | 35           | 0.1581 |
| D2, D3 | 14,857   | 35           | 0.1932 |

Supplementary material for [L Lins], [2016], [Species variability and connectivity in the deep sea: evaluating effects of spatial heterogeneity and hydrodynamic effects]

|        |         |    |        |
|--------|---------|----|--------|
| D2, D4 | 16,355  | 35 | 0.1534 |
| D3, D4 | 0.52802 | 35 | 0.6108 |

Within level 'SHALLOW' of factor 'Depth'

| Groups     | t        | Unique perms | P(MC)         |
|------------|----------|--------------|---------------|
| S1, S4     | 43,932   | 10           | <b>0.0127</b> |
| S1, S7     | 4.85E+02 | 10           | 0.9671        |
| S1, S2     | 13,419   | 10           | 0.2507        |
| S1, S614   | 2,617    | 10           | 0.0761        |
| S1, S613   | 25,712   | 10           | 0.0639        |
| S4, S7     | 21,765   | 10           | 0.1079        |
| S4, S2     | 42,708   | 10           | <b>0.0127</b> |
| S4, S614   | 20,996   | 10           | 0.1254        |
| S4, S613   | 65,162   | 10           | <b>0.0032</b> |
| S7, S2     | 0.85525  | 10           | 0.4589        |
| S7, S614   | 0.97067  | 3            | 0.4387        |
| S7, S613   | 13,943   | 10           | 0.2571        |
| S2, S614   | 25,694   | 10           | 0.0814        |
| S2, S613   | 0.49958  | 10           | 0.6447        |
| S614, S613 | 47,643   | 10           | <b>0.0171</b> |

**Supplementary Table 3:** Table of results from the multivariate PERMANOVA two-way nested design test and pairwise t-tests for Total Organic Carbon (%). Values in bold represent significant values.

| PERMANOVA table of results<br>(2-factor design) |    |        |         |          |               |              |
|-------------------------------------------------|----|--------|---------|----------|---------------|--------------|
| Source                                          | df | SS     | MS      | Pseudo-F | P(perm)       | Unique perms |
| Depth                                           | 1  | 24,328 | 24,328  | 68.19    | <b>0.0031</b> | 2975         |
| Station(Depth)                                  | 8  | 27,534 | 0.34417 | 1.7061   | 0.1482        | 9942         |
| Res                                             | 22 | 4.4381 | 0.20173 |          |               |              |
| Total                                           | 31 | 31     |         |          |               |              |

PAIR-WISE TESTS

Term 'Station(Depth)'

Within level 'DEEP' of factor 'Depth'

| Groups | t       | Unique perms | P(MC)         |
|--------|---------|--------------|---------------|
| D1, D2 | 0.23752 | 35           | 0.8173        |
| D1, D3 | 25,534  | 35           | <b>0.0417</b> |
| D1, D4 | 0.91472 | 35           | 0.3884        |
| D2, D3 | 11,073  | 35           | 0.3213        |

|        |         |    |        |
|--------|---------|----|--------|
| D2, D4 | 0.34137 | 35 | 0.7475 |
| D3, D4 | 11,913  | 35 | 0.2853 |

Within level 'SHALLOW' of factor 'Depth'

| Groups     | t       | Unique perms | P(MC)         |
|------------|---------|--------------|---------------|
| S1, S4     | 69,773  | 10           | <b>0.0027</b> |
| S1, S7     | 0.721   | 10           | 0.517         |
| S1, S2     | 0.64104 | 10           | 0.5577        |
| S1, S614   | 0.31006 | 10           | 0.7737        |
| S1, S613   | 2,198   | 10           | 0.0896        |
| S4, S7     | 59,241  | 10           | <b>0.0097</b> |
| S4, S2     | 29,036  | 10           | <b>0.0415</b> |
| S4, S614   | 24,086  | 10           | 0.0942        |
| S4, S613   | 1.21    | 10           | 0.2871        |
| S7, S2     | 0.91122 | 10           | 0.4207        |
| S7, S614   | 0.53866 | 3            | 0.6433        |
| S7, S613   | 20,931  | 10           | 0.1266        |
| S2, S614   | 0.14015 | 10           | 0.9037        |
| S2, S613   | 12,206  | 10           | 0.2896        |
| S614, S613 | 10,775  | 10           | 0.356         |

**Supplementary Table 4:** Table of results from the multivariate PERMANOVA two-way nested design test and pairwise t-tests for Total Nitrogen (%). Values in bold represent significant values.

PERMANOVA table of results  
(2-factor design)

| Source         | df | SS     | MS      | Pseudo-F | P(perm) | Unique perms |
|----------------|----|--------|---------|----------|---------|--------------|
| Depth          | 1  | 13,669 | 13,669  | 1,149    | 0.3532  | 3010         |
| Station(Depth) | 8  | 93,176 | 11,647  | 12,613   | 0.246   | 9929         |
| Res            | 22 | 20,316 | 0.92343 |          |         |              |
| Total          | 31 | 31     |         |          |         |              |

PAIR-WISE TESTS

Term 'Station(Depth)'

Within level 'DEEP' of factor 'Depth'

| Groups | t       | Unique perms | P(MC)  |
|--------|---------|--------------|--------|
| D1, D2 | 10,171  | 15           | 0.3465 |
| D1, D3 | 0.51803 | 4            | 0.6248 |
| D1, D4 | 0.1894  | 8            | 0.8526 |
| D2, D3 | 14,632  | 8            | 0.19   |
| D2, D4 | 0.74632 | 15           | 0.4868 |
| D3, D4 | 0.63864 | 4            | 0.542  |

Within level 'SHALLOW' of factor 'Depth'

| Groups     | t       | Unique perms | P(MC)         |
|------------|---------|--------------|---------------|
| S1, S4     | 11,913  | 2            | 0.2925        |
| S1, S7     | 51,545  | 4            | <b>0.0146</b> |
| S1, S2     | 1       | 1            | 0.3738        |
| S1, S614   | 12,399  | 4            | <b>0.0006</b> |
| S1, S613   | 36,177  | 4            | <b>0.0248</b> |
| S4, S7     | 0.82471 | 10           | 0.4677        |
| S4, S2     | 11,092  | 4            | 0.3355        |
| S4, S614   | 0.77009 | 10           | 0.5019        |
| S4, S613   | 0.74004 | 10           | 0.4872        |
| S7, S2     | 0.45648 | 7            | 0.676         |
| S7, S614   | 1,801   | 3            | 0.2177        |
| S7, S613   | 19,838  | 10           | 0.1387        |
| S2, S614   | 11,506  | 7            | 0.333         |
| S2, S613   | 2.51    | 7            | 0.0646        |
| S614, S613 | 15,554  | 10           | 0.2141        |

**Supplementary Table 5:** Table of results from the multivariate PERMANOVA two-way nested design test and pairwise t-tests for Chlorophyll a ( $\mu\text{g/g}$ ). Values in bold represent significant values.

PERMANOVA table of results  
(2-factor design)

| Source         | df | SS     | MS     | Pseudo-F | P(perm)       | Unique perms | P(MC)  |
|----------------|----|--------|--------|----------|---------------|--------------|--------|
| Depth          | 1  | 80,288 | 80,288 | 33,462   |               | 72           | 0.1063 |
| Station(Depth) | 8  | 17,986 | 22,482 | 99,215   | <b>0.0028</b> | 9931         |        |
| Res            | 22 | 49,853 | 0.2266 |          |               |              |        |
| Total          | 31 | 31     |        |          |               |              |        |

PAIR-WISE TESTS

Within level 'DEEP' of factor 'Depth'

| Groups | t                |
|--------|------------------|
| D1, D2 | Denominator is 0 |
| D1, D3 | Denominator is 0 |
| D1, D4 | Denominator is 0 |
| D2, D3 | Denominator is 0 |
| D2, D4 | Denominator is 0 |
| D3, D4 | Denominator is 0 |

Within level 'SHALLOW' of factor 'Depth'



| Groups           | t       | Unique perms | P(MC)         |
|------------------|---------|--------------|---------------|
| S1, S4           | 3,064   | 10           | <b>0.0351</b> |
| S1, S7           | 82,415  | 7            | <b>0.0033</b> |
| S1, S2           | 0.56826 | 10           | 0.6091        |
| S1, S614         | 82,415  | 7            | <b>0.0031</b> |
| S1, S613         | 15,569  | 10           | 0.1936        |
| S4, S7           | 2,905   | 7            | 0.0624        |
| S4, S2           | 27,014  | 10           | 0.0544        |
| S4, S614         | 2,905   | 7            | 0.0602        |
| S4, S613         | 24,855  | 10           | 0.0661        |
| S7, S2           | 1,935   | 7            | 0.149         |
| Denominator is 0 |         |              |               |
| S7, S614         |         |              |               |
| S7, S613         | 29,953  | 7            | 0.0617        |
| S2, S614         | 1,935   | 7            | 0.1473        |
| S2, S613         | 0.58587 | 10           | 0.584         |
| S614, S613       | 29,953  | 7            | 0.0583        |

**Supplementary Table 6:** Table of results from the multivariate PERMANOVA two-way nested design test and pairwise t-tests for Carotenes ( $\mu\text{g/g}$ ). Values in bold represent significant values.

PERMANOVA table of results  
(2-factor design)

| Source         | df | SS     | MS      | Pseudo-F | P(perm)       | Unique perms |
|----------------|----|--------|---------|----------|---------------|--------------|
| Depth          | 1  | 72,472 | 72,472  | 3,644    | <b>0.0386</b> | 2997         |
| Station(Depth) | 8  | 14,936 | 1,867   | 46,588   | <b>0.0045</b> | 9952         |
| Res            | 22 | 88,166 | 0.40075 |          |               |              |
| Total          | 31 | 31     |         |          |               |              |

PAIR-WISE TESTS

Term 'Station(Depth)'

Within level 'DEEP' of factor 'Depth'

| Groups | t       | Unique perms | P(MC)  |
|--------|---------|--------------|--------|
| D1, D2 | 10,171  | 15           | 0.3529 |
| D1, D3 | 0.51803 | 4            | 0.6183 |
| D1, D4 | 0.1894  | 8            | 0.8558 |
| D2, D3 | 14,632  | 8            | 0.1964 |
| D2, D4 | 0.74632 | 15           | 0.4832 |
| D3, D4 | 0.63864 | 4            | 0.5433 |

Within level 'SHALLOW' of factor 'Depth'

| Groups | t | Unique perms | P(MC) |
|--------|---|--------------|-------|
|--------|---|--------------|-------|

Supplementary material for [L Lins], [2016], [Species variability and connectivity in the deep sea: evaluating effects of spatial heterogeneity and hydrodynamic effects]

|            |         |    |               |
|------------|---------|----|---------------|
| S1, S4     | 2,271   | 10 | 0.0875        |
| S1, S7     | 19,895  | 10 | 0.1385        |
| S1, S2     | 0.72924 | 10 | 0.4989        |
| S1, S614   | 18,669  | 10 | 0.1602        |
| S1, S613   | 30,912  | 10 | <b>0.0403</b> |
| S4, S7     | 19,487  | 10 | 0.1428        |
| S4, S2     | 17,777  | 10 | 0.1559        |
| S4, S614   | 19,374  | 10 | 0.1495        |
| S4, S613   | 0.79021 | 10 | 0.4756        |
| S7, S2     | 0.98405 | 10 | 0.4014        |
| S7, S614   | 1,801   | 3  | 0.2104        |
| S7, S613   | 28,504  | 10 | 0.0662        |
| S2, S614   | 0.95874 | 10 | 0.4111        |
| S2, S613   | 17,076  | 10 | 0.1642        |
| S614, S613 | 28,251  | 10 | 0.0658        |

**Supplementary Table 7:** Table of results from the multivariate PERMANOVA two-way nested design test and pairwise t-tests for Chloroplastic Pigment Equivalents (Chla + phaeopigments) in µg/g. Values in bold represent significant values.

| PERMANOVA table of results<br>(2-factor design) |    |        |         |          |         |              |
|-------------------------------------------------|----|--------|---------|----------|---------|--------------|
| Source                                          | df | SS     | MS      | Pseudo-F | P(perm) | Unique perms |
| Depth                                           | 1  | 1.7584 | 1.7584  | 0.88153  | 0.4262  | 1247         |
| Station(Depth)                                  | 8  | 15,683 | 1.9604  | 2,188    | 0.0632  | 9944         |
| Res                                             | 25 | 22,399 | 0.89596 |          |         |              |
| Total                                           | 34 | 39,745 |         |          |         |              |

PAIR-WISE TESTS

Term 'Station(Depth)'

Within level 'DEEP' of factor 'Depth'

| Groups | t       | Unique perms | P(MC)        |
|--------|---------|--------------|--------------|
| D1, D2 | 19,931  | 35           | 0.0956       |
| D1, D3 | 11,297  | 35           | 0.2983       |
| D1, D4 | 11,256  | 35           | 0.3002       |
| D2, D3 | 0.32117 | 35           | 0.7622       |
| D2, D4 | 29,688  | 35           | <b>0.026</b> |
| D3, D4 | 1,803   | 35           | 0.1239       |

Within level 'SHALLOW' of factor 'Depth'

| Groups | t      | Unique perms | P(MC)  |
|--------|--------|--------------|--------|
| S1, S4 | 21,911 | 10           | 0.0909 |
| S1, S7 | 20,528 | 35           | 0.0929 |
| S1, S2 | 15,427 | 10           | 0.1928 |

|            |          |    |        |
|------------|----------|----|--------|
| S1, S614   | 21,028   | 10 | 0.1034 |
| S1, S613   | 25,457   | 10 | 0.0675 |
| S4, S7     | 0.55518  | 35 | 0.6057 |
| S4, S2     | 0.59708  | 10 | 0.5868 |
| S4, S614   | 0.87619  | 10 | 0.4261 |
| S4, S613   | 0.39437  | 10 | 0.7152 |
| S7, S2     | 0.16946  | 35 | 0.8768 |
| S7, S614   | 0.25975  | 35 | 0.8014 |
| S7, S613   | 0.30146  | 35 | 0.777  |
| S2, S614   | 2.61E+02 | 10 | 0.9855 |
| S2, S613   | 0.43361  | 10 | 0.6877 |
| S614, S613 | 16,224   | 10 | 0.1809 |

**Supplementary Table 8:** Table of results from the multivariate PERMANOVA two-way nested design test and pairwise t-tests for Pielou's Evenness (J'). Values in bold represent significant values.

| PERMANOVA table of results<br>(2-factor design) |    |        |        |          |               |              |  |
|-------------------------------------------------|----|--------|--------|----------|---------------|--------------|--|
| Source                                          | df | SS     | MS     | Pseudo-F | P(perm)       | Unique perms |  |
| Depth                                           | 1  | 51.09  | 51.09  | 7.9858   | <b>0.0249</b> | 1256         |  |
| Station(Depth)                                  | 8  | 49,471 | 6.1838 | 2.5175   | <b>0.0352</b> | 9950         |  |
| Res                                             | 25 | 61,407 | 2.4563 |          |               |              |  |
| Total                                           | 34 | 166.19 |        |          |               |              |  |

PAIR-WISE TESTS

Term 'Station(Depth)'

Within level 'DEEP' of factor 'Depth'

| Groups | t       | Unique perms | P(MC)  |
|--------|---------|--------------|--------|
| D1, D2 | 17,005  | 35           | 0.1341 |
| D1, D3 | 13,561  | 35           | 0.2247 |
| D1, D4 | 0.30917 | 35           | 0.7727 |
| D2, D3 | 0.17259 | 35           | 0.8632 |
| D2, D4 | 13,559  | 35           | 0.2177 |
| D3, D4 | 10,458  | 35           | 0.3349 |

Within level 'SHALLOW' of factor 'Depth'

| Groups   | t       | Unique perms | P(MC)         |
|----------|---------|--------------|---------------|
| S1, S4   | 15,485  | 10           | 0.1929        |
| S1, S7   | 29,366  | 35           | 0.0307        |
| S1, S2   | 0.60365 | 10           | 0.59          |
| S1, S614 | 34,028  | 10           | <b>0.0277</b> |
| S1, S613 | 20,977  | 10           | 0.1059        |
| S4, S7   | 0.83038 | 35           | 0.4515        |
| S4, S2   | 12,653  | 10           | 0.281         |
| S4, S614 | 0.24289 | 10           | 0.8264        |
| S4, S613 | 0.48703 | 10           | 0.6484        |
| S7, S2   | 26,766  | 35           | <b>0.0472</b> |

|            |         |    |               |
|------------|---------|----|---------------|
| S7, S614   | 0.89408 | 35 | 0.412         |
| S7, S613   | 0.22099 | 35 | 0.8344        |
| S2, S614   | 37,889  | 10 | <b>0.0169</b> |
| S2, S613   | 18,584  | 10 | 0.1418        |
| S614, S613 | 0.4437  | 10 | 0.6781        |

**Supplementary Table 9:** Table of results from the multivariate PERMANOVA two-way nested design test and pairwise t-tests for Shanon-Wiener diversity (H'). Values in bold represent significant values.

PERMANOVA table of results

| Source         | df | SS     | MS     | Pseudo-F | P(perm)       | Unique perms |
|----------------|----|--------|--------|----------|---------------|--------------|
| Depth          | 1  | 94.88  | 94.88  | 91,429   | <b>0.0168</b> | 1256         |
| Station(Depth) | 8  | 80,234 | 10,029 | 24,215   | 0.0457        | 9941         |
| Res            | 25 | 103.55 | 41,419 |          |               |              |
| Total          | 34 | 287.97 |        |          |               |              |

PAIR-WISE TESTS

Term 'Station(Depth)'

Within level 'DEEP' of factor 'Depth'

| Groups | t       | Unique perms | P(MC)  |
|--------|---------|--------------|--------|
| D1, D2 | 14,246  | 35           | 0.2047 |
| D1, D3 | 11,205  | 35           | 0.3043 |
| D1, D4 | 0.48756 | 35           | 0.6371 |
| D2, D3 | 0.24395 | 35           | 0.8117 |
| D2, D4 | 0.80301 | 35           | 0.4486 |
| D3, D4 | 0.55524 | 35           | 0.5978 |

Within level 'SHALLOW' of factor 'Depth'

| Groups       | t       | Unique perms | P(MC)         |
|--------------|---------|--------------|---------------|
| St1, St4     | 10,783  | 10           | 0.3365        |
| St1, St7     | 33,664  | 35           | <b>0.019</b>  |
| St1, St2     | 0.1162  | 10           | 0.9104        |
| St1, St614   | 40,957  | 10           | <b>0.0141</b> |
| St1, St613   | 17,301  | 10           | 0.1639        |
| St4, St7     | 12,852  | 35           | 0.258         |
| St4, St2     | 11,654  | 10           | 0.3134        |
| St4, St614   | 0.31719 | 10           | 0.7659        |
| St4, St613   | 0.50139 | 10           | 0.642         |
| St7, St2     | 36,149  | 35           | <b>0.0147</b> |
| St7, St614   | 15,434  | 35           | 0.1828        |
| St7, St613   | 0.62355 | 35           | 0.5708        |
| St2, St614   | 71,147  | 10           | <b>0.0016</b> |
| St2, St613   | 18,401  | 10           | 0.1448        |
| St614, St613 | 0.38887 | 10           | 0.7129        |

**Supplementary Table 10:** Table of results from the multivariate PERMANOVA two-way nested design test and pairwise t-tests for Expected genera (EG(80)). Values in bold represent significant values.

---

PERMANOVA table of results  
(2-factor design)

| Source         | df | SS    | MS     | Pseudo-F | P(perm)       | Unique perms |
|----------------|----|-------|--------|----------|---------------|--------------|
| Depth          | 1  | 13517 | 13517  | 6.7478   | <b>0.0028</b> | 1259         |
| Station(Depth) | 8  | 15514 | 1939.2 | 1.5908   | <b>0.0001</b> | 9745         |
| Res            | 25 | 30475 | 1219   |          |               |              |
| Total          | 34 | 59461 |        |          |               |              |

---

PAIR-WISE TESTS

Term 'Station(Depth)'

Within level 'DEEP' of factor 'Depth'

| Groups | t       | Unique perms | P(MC)  |
|--------|---------|--------------|--------|
| D1, D2 | 0.76301 | 35           | 0.7173 |
| D1, D3 | 0.9061  | 35           | 0.5444 |
| D1, D4 | 0.84413 | 35           | 0.6229 |
| D2, D3 | 10,155  | 35           | 0.4024 |
| D2, D4 | 0.86606 | 35           | 0.5949 |
| D3, D4 | 0.88881 | 35           | 0.5807 |

Within level 'SHALLOW' of factor 'Depth'

| Groups     | t       | Unique perms | P(MC)         |
|------------|---------|--------------|---------------|
| S1, S4     | 1,248   | 10           | 0.2218        |
| S1, S7     | 19,035  | 35           | <b>0.0235</b> |
| S1, S2     | 12,887  | 10           | 0.2012        |
| S1, S614   | 15,582  | 10           | 0.0839        |
| S1, S613   | 11,945  | 10           | 0.2625        |
| S4, S7     | 16,065  | 35           | 0.0602        |
| S4, S2     | 12,669  | 10           | 0.2076        |
| S4, S614   | 15,113  | 10           | 0.0978        |
| S4, S613   | 12,013  | 10           | 0.2592        |
| S7, S2     | 1.67    | 35           | <b>0.0492</b> |
| S7, S614   | 12,541  | 35           | 0.2045        |
| S7, S613   | 16,441  | 35           | 0.054         |
| S2, S614   | 14,735  | 10           | 0.1186        |
| S2, S613   | 0.77248 | 10           | 0.6776        |
| S614, S613 | 12,894  | 10           | 0.1995        |

---

**Supplementary Table 11:** Table of results from the multivariate PERMANOVA two-way nested design test and pairwise t-tests for nematode community composition. Values in bold represent significant values.

---

PERMANOVA table of results  
(2-factor design)

Supplementary material for [L Lins], [2016], [Species variability and connectivity in the deep sea: evaluating effects of spatial heterogeneity and hydrodynamic effects]

| Source         | df | SS     | MS     | Pseudo-F | P(perm)       | Unique perms |
|----------------|----|--------|--------|----------|---------------|--------------|
| Depth          | 1  | 1974.6 | 1974.6 | 14,297   | <b>0.0013</b> | 1257         |
| Station(Depth) | 8  | 1068.2 | 133.53 | 1.2756   | 0.2391        | 9929         |
| Res            | 25 | 2617   | 104.68 |          |               |              |
| Total          | 34 | 5606   |        |          |               |              |

PAIR-WISE TESTS

Term 'Station(Depth)'

Within level 'DEEP' of factor 'Depth'

| Groups | t       | Unique perms | P(MC)  |
|--------|---------|--------------|--------|
| D1, D2 | 0.51763 | 35           | 0.8016 |
| D1, D3 | 0.37384 | 35           | 0.8242 |
| D1, D4 | 0.71546 | 35           | 0.5998 |
| D2, D3 | 0.38009 | 35           | 0.8599 |
| D2, D4 | 0.51489 | 35           | 0.7916 |
| D3, D4 | 0.38968 | 35           | 0.8624 |

Within level 'SHALLOW' of factor 'Depth'

| Groups     | t       | Unique perms | P(MC)         |
|------------|---------|--------------|---------------|
| S1, S4     | 0.58178 | 10           | 0.6937        |
| S1, S7     | 10,792  | 35           | 0.3396        |
| S1, S2     | 10,727  | 10           | 0.3577        |
| S1, S614   | 0.88803 | 10           | 0.4849        |
| S1, S613   | 0.88786 | 10           | 0.4648        |
| S4, S7     | 0.97944 | 35           | 0.4039        |
| S4, S2     | 22,706  | 10           | 0.0505        |
| S4, S614   | 0.5012  | 10           | 0.7517        |
| S4, S613   | 19,218  | 10           | 0.1004        |
| S7, S2     | 20,569  | 35           | <b>0.0395</b> |
| S7, S614   | 0.44003 | 35           | 0.8343        |
| S7, S613   | 15,491  | 35           | 0.127         |
| S2, S614   | 23,118  | 10           | 0.0549        |
| S2, S613   | 0.83393 | 10           | 0.5643        |
| S614, S613 | 20,307  | 10           | 0.1135        |

**Supplementary Table 12:** Table of results from the multivariate PERMANOVA two-way nested design test and pairwise t-tests for nematode trophic composition. Values in bold represent significant values.

|         | %TN          | %TOC         | Chla        | Carotenes | CPE         | Silt-Clay    | Very Fine Sand | Fine Sand   | Medium Sand | Coarse Sand | SED         |
|---------|--------------|--------------|-------------|-----------|-------------|--------------|----------------|-------------|-------------|-------------|-------------|
| H'      | <b>-0.38</b> | <b>-0.44</b> | 0.26        | 0.32      | 0.32        | <b>-0.46</b> | <b>0.43</b>    | <b>0.41</b> | <b>0.42</b> | 0.3         | <b>0.51</b> |
| J       | 0.26         | 0.12         | -0.11       | -0.09     | -0.28       | 0.19         | -0.22          | -0.26       | -0.2        | 0.04        | -0.17       |
| EG (80) | <b>-0.43</b> | <b>-0.46</b> | 0.25        | 0.31      | <b>0.36</b> | <b>-0.47</b> | <b>0.45</b>    | <b>0.45</b> | <b>0.44</b> | 0.28        | <b>0.52</b> |
| TD      | <b>-0.4</b>  | -0.28        | <b>0.37</b> | 0.3       | <b>0.39</b> | <b>-0.37</b> | <b>0.48</b>    | <b>0.41</b> | 0.34        | 0.05        | <b>0.4</b>  |

**Supplementary Table 13:** Spearman correlations between the nematode univariate variables Shannon-Wiener diversity (H'), Pielou's Evenness (J), Expected genera (EG (80)) and Trophic Diversity (TD)

Supplementary material for [L Lins], [2016], [Species variability and connectivity in the deep sea: evaluating effects of spatial heterogeneity and hydrodynamic effects]

with sediment environmental variables. %TN= Total Nitrogen (%), %TOC=Total Organic Carbon (%), Chla= Chlorophyll a, Carotenes, CPE= Chloroplastic Pigment Equivalents, Silt-Clay, Very Fine Sand, Fine Sand, Medium Sand, Coarse Sand and SED=Sediment Diversity.

| Field ID | Order          | Family            | Genus                 | Latitude    | Longitude   | Depth (m) | GenBank Accession numbers            |
|----------|----------------|-------------------|-----------------------|-------------|-------------|-----------|--------------------------------------|
| 77L10H15 | Plectida       | Camacolaimidae    | <i>Camacolaimus</i>   | 37°49'661"N | 09°28'042"W | 1006      | N/A - to be provided upon acceptance |
| 52L27G15 | Plectida       | Camacolaimidae    | <i>Camacolaimus</i>   | 37°49'661"N | 09°28'042"W | 1006      | N/A - to be provided upon acceptance |
| 97L22D15 | Araeolaimida   | Diplopeltidae     | <i>Campylaimus</i>    | 37°58.904'N | 09°07.525'W | 335       | N/A - to be provided upon acceptance |
| 81L18E15 | Monhysterida   | Xyalidae          | <i>Capsula</i>        | 37°58.904'N | 09°07.525'W | 335       | N/A - to be provided upon acceptance |
| 42L29D15 | Plectida       | Ceramonematidae   | <i>Ceramonema</i>     | 37°58.904'N | 09°07.525'W | 335       | N/A - to be provided upon acceptance |
| 50L26C15 | Plectida       | Ceramonematidae   | <i>Ceramonema</i>     | 37°51.171'N | 09°06.944'W | 325       | N/A - to be provided upon acceptance |
| 15L17C15 | Araeolaimida   | Comesomatidae     | <i>Cervonema</i>      | 37°51.171'N | 09°06.944'W | 325       | N/A - to be provided upon acceptance |
| 25L20C15 | Araeolaimida   | Comesomatidae     | <i>Cervonema</i>      | 37°51.171'N | 09°06.944'W | 325       | N/A - to be provided upon acceptance |
| 28L20C15 | Araeolaimida   | Comesomatidae     | <i>Cervonema</i>      | 37°51.171'N | 09°06.944'W | 325       | N/A - to be provided upon acceptance |
| 20L27D15 | Monhysterida   | Xyalidae          | <i>Daptonema</i>      | 37°58.904'N | 09°07.525'W | 335       | N/A - to be provided upon acceptance |
| 55L26C15 | Monhysterida   | Xyalidae          | <i>Daptonema</i>      | 37°51.171'N | 09°06.944'W | 325       | N/A - to be provided upon acceptance |
| 48L27G15 | Desmodorida    | Desmodoridae      | <i>Desmodora</i>      | 37°49'661"N | 09°28'042"W | 1006      | N/A - to be provided upon acceptance |
| 56L28G15 | Desmodorida    | Desmodoridae      | <i>Desmodora</i>      | 37°49'661"N | 09°28'042"W | 1006      | N/A - to be provided upon acceptance |
| 76L10H15 | Desmodorida    | Desmodoridae      | <i>Desmodora</i>      | 37°49'661"N | 09°28'042"W | 1006      | N/A - to be provided upon acceptance |
| 42L27G15 | Desmodorida    | Desmodoridae      | <i>Desmodora</i>      | 37°49'661"N | 09°28'042"W | 1006      | N/A - to be provided upon acceptance |
| 41L29D15 | Desmodorida    | Desmodoridae      | <i>Desmodorella</i>   | 37°58.904'N | 09°07.525'W | 335       | N/A - to be provided upon acceptance |
| 46L29D15 | Desmodorida    | Desmodoridae      | <i>Desmodorella</i>   | 37°58.904'N | 09°07.525'W | 335       | N/A - to be provided upon acceptance |
| 54L27G15 | Desmoscolecida | Desmoscolecidae   | <i>Desmoscolex</i>    | 37°49'661"N | 09°28'042"W | 1006      | N/A - to be provided upon acceptance |
| 84L10H15 | Desmoscolecida | Desmoscolecidae   | <i>Desmoscolex</i>    | 37°49'661"N | 09°28'042"W | 1006      | N/A - to be provided upon acceptance |
| 62L28G15 | Desmoscolecida | Desmoscolecidae   | <i>Desmoscolex</i>    | 37°49'661"N | 09°28'042"W | 1006      | N/A - to be provided upon acceptance |
| 93L19E15 | Chromadorida   | Chromadoridae     | <i>Dichromadora</i>   | 37°58.904'N | 09°07.525'W | 335       | N/A - to be provided upon acceptance |
| 93L31C15 | Plectida       | Diplopeltooididae | <i>Diplopeltoides</i> | 37°51.171'N | 09°06.944'W | 325       | N/A - to be provided upon acceptance |
| 90L11H15 | Chromadorida   | Selachinematidae  | <i>Gammanema</i>      | 37°49'661"N | 09°28'042"W | 1006      | N/A - to be provided upon acceptance |
| 3L22D15  | Chromadorida   | Selachinematidae  | <i>Gammanema</i>      | 37°58.904'N | 09°07.525'W | 335       | N/A - to be provided upon acceptance |
| 51L04E15 | Chromadorida   | Selachinematidae  | <i>Gammanema</i>      | 37°58.904'N | 09°07.525'W | 335       | N/A - to be provided upon acceptance |
| 5L16C15  | Chromadorida   | Selachinematidae  | <i>Gammanema</i>      | 37°51.171'N | 09°06.944'W | 325       | N/A - to be provided upon acceptance |
| 65L05E15 | Chromadorida   | Selachinematidae  | <i>Gammanema</i>      | 37°58.904'N | 09°07.525'W | 335       | N/A - to be provided upon acceptance |
| 9L17C15  | Desmoscolecida | Desmoscolecidae   | <i>Greeffilla</i>     | 37°51.171'N | 09°06.944'W | 325       | N/A - to be provided upon acceptance |
| 89L30C15 | Enoplida       | Oxystominidae     | <i>Halalaimus</i>     | 37°51.171'N | 09°06.944'W | 325       | N/A - to be provided upon acceptance |
| 19L14G15 | Enoplida       | Oxystominidae     | <i>Halalaimus</i>     | 37°49'661"N | 09°28'042"W | 1006      | N/A - to be provided upon acceptance |
| 60L28G15 | Enoplida       | Oxystominidae     | <i>Halalaimus</i>     | 37°49'661"N | 09°28'042"W | 1006      | N/A - to be provided upon acceptance |
| 51L26C15 | Enoplida       | Oxystominidae     | <i>Halalaimus</i>     | 37°51.171'N | 09°06.944'W | 325       | N/A - to be provided upon acceptance |

Supplementary material for [L Lins], [2016], [Species variability and connectivity in the deep sea: evaluating effects of spatial heterogeneity and hydrodynamic effects]

|           |              |                    |                         |             |             |      |                                      |
|-----------|--------------|--------------------|-------------------------|-------------|-------------|------|--------------------------------------|
| 88L18E15  | Enoplida     | Oxystominidae      | <i>Halalaimus</i>       | 37°58.904'N | 09°07.525'W | 335  | N/A - to be provided upon acceptance |
| 87L18E15  | Enoplida     | Oxystominidae      | <i>Halalaimus</i>       | 37°58.904'N | 09°07.525'W | 335  | N/A - to be provided upon acceptance |
| 66L05E15  | Enoplida     | Oxystominidae      | <i>Halalaimus</i>       | 37°58.904'N | 09°07.525'W | 335  | N/A - to be provided upon acceptance |
| 100L11H15 | Enoplida     | Oxystominidae      | <i>Halalaimus</i>       | 37°49'661'N | 09°28'042'W | 1006 | N/A - to be provided upon acceptance |
| 64L28G15  | Enoplida     | Oxystominidae      | <i>Halalaimus</i>       | 37°49'661'N | 09°28'042'W | 1006 | N/A - to be provided upon acceptance |
| 50L27G15  | Enoplida     | Oxystominidae      | <i>Halalaimus</i>       | 37°49'661'N | 09°28'042'W | 1006 | N/A - to be provided upon acceptance |
| 99L19E15  | Enoplida     | Oxystominidae      | <i>Halalaimus</i>       | 37°58.904'N | 09°07.525'W | 335  | N/A - to be provided upon acceptance |
| 77L30C15  | Enoplida     | Oxystominidae      | <i>Halalaimus</i>       | 37°51.171'N | 09°06.944'W | 325  | N/A - to be provided upon acceptance |
| 65L07H15  | Enoplida     | Oxystominidae      | <i>Halalaimus</i>       | 37°49'661'N | 09°28'042'W | 1006 | N/A - to be provided upon acceptance |
| 40L15G15  | Enoplida     | Oxystominidae      | <i>Halalaimus</i>       | 37°49'661'N | 09°28'042'W | 1006 | N/A - to be provided upon acceptance |
| 39L15G15  | Enoplida     | Oxystominidae      | <i>Halalaimus</i>       | 37°49'661'N | 09°28'042'W | 1006 | N/A - to be provided upon acceptance |
| 78L30C15  | Chromadorida | Selachinematidae   | <i>Halichoanolaimus</i> | 37°51.171'N | 09°06.944'W | 325  | N/A - to be provided upon acceptance |
| 7L13G15   | Enoplida     | Enchelidiidae      | <i>Ledovitia</i>        | 37°49'661'N | 09°28'042'W | 1006 | N/A - to be provided upon acceptance |
| 64L27C15  | Plectida     | Leptolaimidae      | <i>Leptolaimus</i>      | 37°51.171'N | 09°06.944'W | 325  | N/A - to be provided upon acceptance |
| 45L25C15  | Plectida     | Leptolaimidae      | <i>Leptolaimus</i>      | 37°51.171'N | 09°06.944'W | 325  | N/A - to be provided upon acceptance |
| 13L27D15  | Plectida     | Leptolaimidae      | <i>Leptolaimus</i>      | 37°58.904'N | 09°07.525'W | 335  | N/A - to be provided upon acceptance |
| 2L13G15   | Plectida     | Leptolaimidae      | <i>Leptolaimus</i>      | 37°49'661'N | 09°28'042'W | 1006 | N/A - to be provided upon acceptance |
| 53L04E15  | Plectida     | Leptolaimidae      | <i>Leptolaimus</i>      | 37°58.904'N | 09°07.525'W | 335  | N/A - to be provided upon acceptance |
| 2L22D15   | Plectida     | Leptolaimidae      | <i>Leptolaimus</i>      | 37°58.904'N | 09°07.525'W | 335  | N/A - to be provided upon acceptance |
| 63L28G15  | Plectida     | Leptolaimidae      | <i>Leptolaimus</i>      | 37°49'661'N | 09°28'042'W | 1006 | N/A - to be provided upon acceptance |
| 24L18C15  | Enoplida     | Thoracostomopsidae | <i>Mesacanthion</i>     | 37°51.171'N | 09°06.944'W | 325  | N/A - to be provided upon acceptance |
| 90L31C15  | Chromadorida | Cyatholaimidae     | <i>Metacyatholaimus</i> | 37°51.171'N | 09°06.944'W | 325  | N/A - to be provided upon acceptance |
| 14L17C15  | Monhysterida | Linhomoeidae       | <i>Metalinhomoeus</i>   | 37°51.171'N | 09°06.944'W | 325  | N/A - to be provided upon acceptance |
| 10L17C15  | Monhysterida | Linhomoeidae       | <i>Metalinhomoeus</i>   | 37°51.171'N | 09°06.944'W | 325  | N/A - to be provided upon acceptance |
| 12L13G15  | Desmodorida  | Microlaimidae      | <i>Microlaimus</i>      | 37°49'661'N | 09°28'042'W | 1006 | N/A - to be provided upon acceptance |
| 50L29D15  | Desmodorida  | Microlaimidae      | <i>Microlaimus</i>      | 37°58.904'N | 09°07.525'W | 335  | N/A - to be provided upon acceptance |
| 56L04E15  | Desmodorida  | Microlaimidae      | <i>Microlaimus</i>      | 37°58.904'N | 09°07.525'W | 335  | N/A - to be provided upon acceptance |
| 83L18E15  | Desmodorida  | Microlaimidae      | <i>Microlaimus</i>      | 37°58.904'N | 09°07.525'W | 335  | N/A - to be provided upon acceptance |
| 86L18E15  | Desmodorida  | Microlaimidae      | <i>Microlaimus</i>      | 37°58.904'N | 09°07.525'W | 335  | N/A - to be provided upon acceptance |
| 80L18E15  | Desmodorida  | Microlaimidae      | <i>Microlaimus</i>      | 37°58.904'N | 09°07.525'W | 335  | N/A - to be provided upon acceptance |
| 63L05E15  | Desmodorida  | Microlaimidae      | <i>Microlaimus</i>      | 37°58.904'N | 09°07.525'W | 335  | N/A - to be provided upon acceptance |
| 49L29D15  | Desmodorida  | Microlaimidae      | <i>Microlaimus</i>      | 37°58.904'N | 09°07.525'W | 335  | N/A - to be provided upon acceptance |
| 4L22D15   | Desmodorida  | Microlaimidae      | <i>Microlaimus</i>      | 37°58.904'N | 09°07.525'W | 335  | N/A - to be provided upon acceptance |
| 79L30C15  | Desmodorida  | Microlaimidae      | <i>Microlaimus</i>      | 37°51.171'N | 09°06.944'W | 325  | N/A - to be provided upon acceptance |
| 43L25C15  | Desmodorida  | Microlaimidae      | <i>Microlaimus</i>      | 37°51.171'N | 09°06.944'W | 325  | N/A - to be provided upon acceptance |



Supplementary material for [L Lins], [2016], [Species variability and connectivity in the deep sea: evaluating effects of spatial heterogeneity and hydrodynamic effects]

|          |                |                  |                        |             |             |      |                                      |
|----------|----------------|------------------|------------------------|-------------|-------------|------|--------------------------------------|
| 46L25C15 | Desmodorida    | Microlaimidae    | <i>Microlaimus</i>     | 37°51.171'N | 09°06.944'W | 325  | N/A - to be provided upon acceptance |
| 1L13G115 | Desmoscolecida | Meyliidae        | <i>Paratricoma</i>     | 37°49'661'N | 09°28'042'W | 1006 | N/A - to be provided upon acceptance |
| 33L28D15 | Plectida       | Camacolaimidae   | <i>Procamacolaimus</i> | 37°58.904'N | 09°07.525'W | 335  | N/A - to be provided upon acceptance |
| 92L31C15 | Plectida       | Camacolaimidae   | <i>Procamacolaimus</i> | 37°51.171'N | 09°06.944'W | 325  | N/A - to be provided upon acceptance |
| 21L27D15 | Plectida       | Camacolaimidae   | <i>Procamacolaimus</i> | 37°58.904'N | 09°07.525'W | 335  | N/A - to be provided upon acceptance |
| 47L29D15 | Plectida       | Camacolaimidae   | <i>Procamacolaimus</i> | 37°58.904'N | 09°07.525'W | 335  | N/A - to be provided upon acceptance |
| 52L04E15 | Plectida       | Ceramonematidae  | <i>Pselionema</i>      | 37°58.904'N | 09°07.525'W | 335  | N/A - to be provided upon acceptance |
| 44L27G15 | Plectida       | Ceramonematidae  | <i>Pselionema</i>      | 37°49'661'N | 09°28'042'W | 1006 | N/A - to be provided upon acceptance |
| 38L15G15 | Plectida       | Ceramonematidae  | <i>Pselionema</i>      | 37°49'661'N | 09°28'042'W | 1006 | N/A - to be provided upon acceptance |
| 14L13G15 | Chromadorida   | Selachinematidae | <i>Richtersia</i>      | 37°49'661'N | 09°28'042'W | 1006 | N/A - to be provided upon acceptance |
| 2L16C15  | Chromadorida   | Selachinematidae | <i>Richtersia</i>      | 37°51.171'N | 09°06.944'W | 325  | N/A - to be provided upon acceptance |
| 23L18C15 | Chromadorida   | Selachinematidae | <i>Richtersia</i>      | 37°51.171'N | 09°06.944'W | 325  | N/A - to be provided upon acceptance |
| 72L27C15 | Chromadorida   | Selachinematidae | <i>Richtersia</i>      | 37°51.171'N | 09°06.944'W | 325  | N/A - to be provided upon acceptance |
| 26L14G15 | Chromadorida   | Selachinematidae | <i>Richtersia</i>      | 37°49'661'N | 09°28'042'W | 1006 | N/A - to be provided upon acceptance |
| 22L14G15 | Plectida       | Haliplectidae    | <i>Setoplectus</i>     | 37°49'661'N | 09°28'042'W | 1006 | N/A - to be provided upon acceptance |
| 86L30C15 | Araeolaimida   | Comesomatidae    | <i>Setosabatieria</i>  | 37°51.171'N | 09°06.944'W | 325  | N/A - to be provided upon acceptance |
| 70L27C15 | Araeolaimida   | Diplopeltidae    | <i>Southerniella</i>   | 37°51.171'N | 09°06.944'W | 325  | N/A - to be provided upon acceptance |
| 9L22D15  | Araeolaimida   | Diplopeltidae    | <i>Southerniella</i>   | 37°58.904'N | 09°07.525'W | 335  | N/A - to be provided upon acceptance |
| 17L13G15 | Enoplida       | Ironidae         | <i>Syringolaimus</i>   | 37°49'661'N | 09°28'042'W | 1006 | N/A - to be provided upon acceptance |
| 60L04E15 | Enoplida       | Ironidae         | <i>Syringolaimus</i>   | 37°58.904'N | 09°07.525'W | 335  | N/A - to be provided upon acceptance |
| 6L16C15  | Desmoscolecida | Desmoscolecidae  | <i>Tricoma</i>         | 37°51.171'N | 09°06.944'W | 325  | N/A - to be provided upon acceptance |
| 43L29D15 | Desmoscolecida | Desmoscolecidae  | <i>Tricoma</i>         | 37°58.904'N | 09°07.525'W | 335  | N/A - to be provided upon acceptance |
| 41L27G15 | Desmoscolecida | Desmoscolecidae  | <i>Tricoma</i>         | 37°49'661'N | 09°28'042'W | 1006 | N/A - to be provided upon acceptance |
| 70L05E15 | Desmoscolecida | Desmoscolecidae  | <i>Tricoma</i>         | 37°58.904'N | 09°07.525'W | 335  | N/A - to be provided upon acceptance |
| 11L27D15 | Enoplida       | Oncholaimidae    | <i>Viscosia</i>        | 37°58.904'N | 09°07.525'W | 335  | N/A - to be provided upon acceptance |
| 96L31C15 | Enoplida       | Oncholaimidae    | <i>Viscosia</i>        | 37°51.171'N | 09°06.944'W | 325  | N/A - to be provided upon acceptance |
| 72L05E15 | Enoplida       | Oncholaimidae    | <i>Viscosia</i>        | 37°58.904'N | 09°07.525'W | 335  | N/A - to be provided upon acceptance |
| 29L28D15 | Enoplida       | Oncholaimidae    | <i>Viscosia</i>        | 37°58.904'N | 09°07.525'W | 335  | N/A - to be provided upon acceptance |
| 64L05E15 | Enoplida       | Oncholaimidae    | <i>Viscosia</i>        | 37°58.904'N | 09°07.525'W | 335  | N/A - to be provided upon acceptance |
| 32L15G15 | Enoplida       | Oxystominidae    | <i>Wieseria</i>        | 37°49'661'N | 09°28'042'W | 1006 | N/A - to be provided upon acceptance |
| 8L17C15  | Monhysterida   | Xyalidae         | not defined            | 37°51.171'N | 09°06.944'W | 325  | N/A - to be provided upon acceptance |

**Supplementary Table 14:** Sequenced nematode genera by ID (Identification number), taxonomic position, location and GenBank Accession numbers.

Supplementary material for [[L Lins](#)], [2016], [[Species variability and connectivity in the deep sea: evaluating effects of spatial heterogeneity and hydrodynamic effects](#)]
